# Supplementary material for: Exploring the feasibility of technological transfers of two by-catch reduction devices in the crustacean bottom trawling of the central Mediterranean
Source: Frontiers journal article supplement (doi:10.3389/fmars.2023.1011605), 2023-04-26
Supplement: Table_1.docx [file Table_1.docx]

**Table S1 -** The swept area of each vessel by haul is estimated as Km2. Δ (%) represents the percentage difference between the higher swept area recorded by a vessel compared to the other ones.

| **Gear** | **Day** | **N haul** | **Speed**  **(m/s)** | **Swept Area (Km2)** | **Δ (%)** |
| --- | --- | --- | --- | --- | --- |
| Control | 1 | 1 | 1.54 | 0.24 |  |
|  |
| G1-SM40 | 1 | 1 | 1.44 | 0.23 | 1.6% |
|
| T90 codend | 1 | 1 | 1.44 | 0.22 | 4.9% |
|
| Control | 1 | 2 | 1.33 | 0.20 | 5.3% |
|
| G1-SM40 | 1 | 2 | 1.28 | 0.21 | 4.0% |
|
| T90 codend | 1 | 2 | 1.38 | 0.22 |  |
|
| Control | 1 | 3 | 1.54 | 0.24 | 1.8% |
|
| G1-SM40 | 1 | 3 | 1.49 | 0.24 |  |
|
| T90 codend | 1 | 3 | 1.49 | 0.23 | 3.3% |
|
| Control | 1 | 4 | 1.49 | 0.23 | 5.0% |
|
| G1-SM40 | 1 | 4 | 1.49 | 0.24 |  |
|
| T90 codend | 1 | 4 | 1.54 | 0.24 | 0.1% |
|
| Control | 2 | 1 | 1.49 | 0.23 | 1.7% |
|
| G1-SM40 | 2 | 1 | 1.44 | 0.23 |  |
|
| T90 codend | 2 | 1 | 1.44 | 0.23 | 3.3% |
|
| Control | 2 | 2 | 1.44 | 0.22 | 0.9% |
|
| G1-SM40 | 2 | 2 | 1.38 | 0.22 |  |
|
| T90 codend | 2 | 2 | 1.38 | 0.22 | 3.3% |
|
| Control | 2 | 3 | 1.44 | 0.22 | 5.0% |
|
| G1-SM40 | 2 | 3 | 1.44 | 0.23 |  |
|
| T90 codend | 2 | 3 | 1.44 | 0.23 | 3.3% |
|
| Control | 2 | 4 | 1.49 | 0.23 |  |
|
| G1-SM40 | 2 | 4 | 1.38 | 0.22 | 0.9% |
|
| T90 codend | 2 | 4 | 1.44 | 0.23 | 1.7% |
|
| Control | 3 | 1 | 1.44 | 0.22 | 5.0% |
|
| G1-SM40 | 3 | 1 | 1.44 | 0.23 |  |
|
| T90 codend | 3 | 1 | 1.54 | 0.24 | 3.4% |
|
| Control | 3 | 2 | 1.49 | 0.23 | 1.7% |
|
| G1-SM40 | 3 | 2 | 1.44 | 0.23 |  |
|
| T90 codend | 3 | 2 | 1.44 | 0.23 | 3.3% |
|
| Control | 3 | 3 | 1.44 | 0.22 | 1.7% |
|
| G1-SM40 | 3 | 3 | 1.38 | 0.22 | 0.9% |
|
| T90 codend | 3 | 3 | 1.44 | 0.23 |  |
|
| Control | 3 | 4 | 1.49 | 0.23 | 4.9% |
|
| G1-SM40 | 3 | 4 | 1.44 | 0.23 | 3.3% |
|
| T90 codend | 3 | 4 | 1.54 | 0.24 |  |
